# Supplementary material for: Increased Plasmatic Levels of Exosomes Are Significantly Related to Relapse Rate in Patients with Oral Squamous Cell Carcinoma: A Cohort Study
Source: MDPI journal article supplement (doi:10.3390/cancers15235693), 2023-12-02

**Table S1.** Results in relapse and non-relapse patients.

| Variable                                         |            | Mean $\pm$ SD         | 95%CI              | p (t-test)   |
|--------------------------------------------------|------------|-----------------------|--------------------|--------------|
| <b>Presurgical concentration (particles/mL)</b>  | No relapse | 8.08E+8 $\pm$ 4.98E+8 | 5.52E+8 to 1.06E+9 | <b>0.006</b> |
|                                                  | Relapse    | 1.41E+9 $\pm$ 5.65E+8 | 9.77E+8 to 1.85E+9 |              |
| <b>Pos surgical concentration (particles/mL)</b> | No relapse | 1.11E+9 (7.34E+8)     | 6.66E+8 to 1.55E+9 | <b>0.046</b> |
|                                                  | Relapse    | 2.97E+9 $\pm$ 2.96E+9 | 2.3E+8 to 5.7E+8   |              |
| <b>Presurgical (nm)</b>                          | No relapse | 134.15 $\pm$ 18.17    | 124.80 to 143.49   | 0.916        |
|                                                  | Relapse    | 132.47 $\pm$ 17.03    | 119.38 to 145.57   |              |
| <b>Pos surgical (nm)</b>                         | No relapse | 132.31 $\pm$ 10.8     | 125.78 to 138.84   | <b>0.03</b>  |
|                                                  | Relapse    | 141.47 $\pm$ 6.57     | 135.39 to 147.55   |              |
| <b>Age</b>                                       | No relapse | 71.55 $\pm$ 14.47     | 64.35 to 78.75     | 0.668        |
|                                                  | Relapse    | 67.94 $\pm$ 11.99     | 58.73 to 77.16     |              |

CI, confidential Interval; SD, standard deviation. Significant results are reported in bold.

**Table S2.** Survival models by Kaplan Meier for disease free survival (DFS) and overall survival (OS).

| Variable                   |      | Estimated average | 95%CI         | p (long-rank test) | Estimated average | 95%CI        | p (long-rank test) |
|----------------------------|------|-------------------|---------------|--------------------|-------------------|--------------|--------------------|
|                            |      | OS                |               |                    | DFS               |              |                    |
| Presurgical concentration  | Low  | 73.56             | 51.20-95.91   | 0.549              | 92.49             | 61.05-123.93 | 0.012              |
|                            | High | 45.65             | 28.71-62.58   |                    | 41.41             | 24.30-58.53  |                    |
| Postsurgical concentration | Low  | 88.51             | 71.23-105.79  | 0.815              | 85.00             | 61.21-108.80 | 0.305              |
|                            | High | 56.72             | 32.165-81.284 |                    | 50.90             | 23.04-78.76  |                    |
| Presurgical dimension      | Low  | 58.47             | 34.02-82.91   | 0.155              | 61.82             | 35.97-87.67  | 0.973              |
|                            | High | 49.07             | 39.48-58.66   |                    | 49.13             | 39.92-58.35  |                    |
| Postsurgical dimension     | Low  | 48.35             | 38.12-58.58   | 0.616              | 48.60             | 38.83-58.37  | 0.365              |
|                            | High | 93.08             | 70.72-103.33  |                    | 78.75             | 46.54-110.96 |                    |

CI, confidential Interval. Significant results are reported in bold.

Figure S1: Correlation between age (years) and A serum exosomes concentration (particles/mL); B exosomal size (nm).

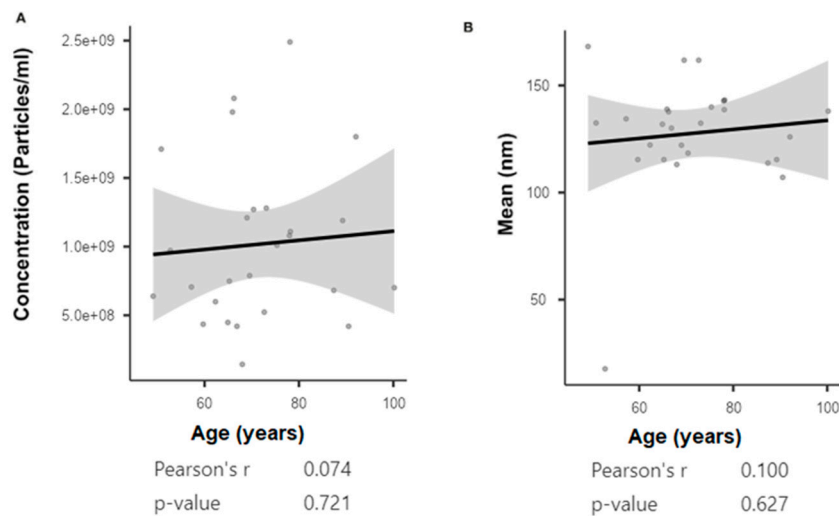

Supplement: s1 [file s1]
